1     **Polar Gini Curve: a Technique to Discover Single-cell Biomarker**  
2                                    **Using 2D Visual Information**

3     Thanh Minh Nguyen<sup>1</sup>, Jacob John Jeevan<sup>1</sup>, Nuo Xu<sup>2</sup>, Jake Chen<sup>1\*</sup>

4     <sup>1</sup>*Informatics Institute, the University of Alabama at Birmingham, AL, United States*

5     <sup>2</sup>*Collat School of Business, the University of Alabama at Birmingham, AL, United States*

6     \*Corresponding author: Jake Chen

7     Email: [jakechen@uab.edu](mailto:jakechen@uab.edu)

8

9     **Running title:** *Nguyen et al / Polar Gini Curve single cell*

10

11    **Authors' ORCID No**

12    Thanh Nguyen: 0000-0002-8440-1594

13    Jacob John Jeevan: 0000-0003-0910-5610

14    Jake Chen: 0000-0001-8829-7504

15

16

17    Total word counts: 3446

18    Total figures: 10

19    Total tables: 0

20    Total supplementary figures: 0

21    Total supplementary tables: 0

22    Total supplementary files: 3

23

## 24 **Abstract**

25 In this work, we design the Polar Gini Curve (PGC) technique, which combines the gene  
26 expression and the 2D embedded visual information to detect biomarkers from single-cell data.  
27 Theoretically, a Polar Gini Curve characterizes the shape and ‘evenness’ of cell-point distribution  
28 of cell-point set. To quantify whether a gene could be a marker in a cell cluster, we can combine  
29 two Polar Gini Curves: one drawn upon the cell-points expressing the gene, and the other drawn  
30 upon all cell-points in the cluster. We hypothesize that the closers these two curves are, the more  
31 likely the gene would be cluster markers. We demonstrate the framework in several simulation  
32 case-studies. Applying our framework in analyzing neonatal mouse heart single-cell data, the  
33 detected biomarkers may characterize novel subtypes of cardiac muscle cells. The source code and  
34 data for PGC could be found at [https://figshare.com/projects/Polar\\_Gini\\_Curve/76749](https://figshare.com/projects/Polar_Gini_Curve/76749).

35

36 **KEYWORDS:** Single-cell gene expression; Gini coefficient; Polar Gini Curve; Biomarker

37

## 38 **Introduction**

39 Discovering biomarkers from the single-cell gene expression data is an interesting yet  
40 challenging problem [1]. Compared to the well-established bulk gene expression data, the  
41 expression distribution in single-cell is significantly more heterogeneous [2-4]. Therefore, as  
42 shown in [5, 6], the bulk-analysis strategies [7, 8] achieve low sensitivity in detecting markers. In  
43 addition, as embedding [9-11] and clustering [12-14] are the essential components in many single-  
44 cell expression analytical pipelines [15, 16], the biomarker detection techniques would need to  
45 tackle the challenges and errors from embedding and clustering [17, 18].

46

47 From the statistical point of view, there are two different directions among the current state-  
48 of-the-art methods in solving the single-cell biomarker discovery problem. The first direction is  
49 using non-parametric approaches [19]. Non-parametric approaches do not attempt to construct the  
50 model characterizing the gene expression distribution [20]. They do not require too many prior  
51 assumptions about the expression data. Therefore, in theory, they could be applied in most of the  
52 heterogeneous scenarios in single-cell expression. For example, Seurat [16] and the SINCERA  
53 [21] pipelines use the Mann–Whitney test [22]. The disadvantages of non-parametric approaches  
54 include lacking the point-estimator (for example, we could not tell how much of fold-change when

55 comparing the expressions of the same gene in two populations) and the lower true positive rate  
56 [5, 6]. On the other hand, the parametric approaches model the underlying expression distribution.  
57 For example, [23] applies Bayesian statistics, Monocle2 [11, 24] and MAST [2] apply different  
58 linear models, and [25] applies the Poisson models to single-cell differential expression analysis.  
59 The parametric approaches, compared to the non-parametric ones, are significantly more sensitive  
60 [5, 6], especially in detecting markers in small cell-cluster since they may require less number of  
61 cell-samples. However, these approaches assume that the gene expression distribution has specific  
62 shapes; therefore, these approaches tend to have higher false-positive rates.

63

64 In this work, we developed a new framework based on the novel idea of integrating expression  
65 and the embedded visual information of single-cell data into one metric to identify biomarkers.  
66 This idea has been successfully implemented in spatial single-cell data, in which the visualization  
67 space reflects the relative position of the cells in a tissue image [26, 27]. In this framework, we  
68 decided to take advantage of cluster shape and cell-point distribution from the 2D visual space.  
69 Our strategy was to project the single-cell 2D cluster onto multiple angle-axes to explore all  
70 viewing angles of the cluster. On each ‘viewing angle’, we captured the visual distribution using  
71 the Gini coefficient [28]. Together, for each set of points in 2D, we constructed a Polar Gini Curve  
72 (PGC) from the correspondent between viewing angle and Gini coefficient. We hypothesized that  
73 for the marker gene, its expressing cell set should have its PGC close to the PGC computed from  
74 the whole cluster cell-set. We demonstrated the framework in several simulation case-studies.  
75 Applying our framework in analyzing neonatal mouse heart single-cell data [29], the detected  
76 biomarkers may characterize novel subtypes of cardiac muscle cells. We named the framework  
77 PGC-RSMD (Polar Gini Curve – Root Mean Square Deviation). The source code and dataset,  
78 including supplemental data, used in this manuscript could be found in  
79 [https://figshare.com/projects/Polar\\_Gini\\_Curve/76749](https://figshare.com/projects/Polar_Gini_Curve/76749).

80

81

## 82 **Material and Method**

### 83 **Computing PGC-RSMD for one gene in one cluster**

84 **Figure 1** demonstrates the workflow to compute PGC-RSMD for one gene in a cell cluster  
85 from the single-cell expression data. Our approach used the 2D embedding [9] and clustering

86 results from single-cell expression data as the input. Starting from the 2D  $x$ - $y$  embedding space,  
87 for an arbitrary angle  $\theta$ , the pipeline projects the  $x$ - $y$  coordinate [30] *for every cell-point* onto the  
88  $\theta$ -axis ( $z$  score)

$$89 \quad z = x\cos(\theta) + y\sin(\theta) \quad (1)$$

90 We subtracted the scores from (1) with the smallest  $z$  to ensure that all  $z$  scores are non-negative,  
91 which is the requirement for computing the Gini coefficient. Then, it computed two Gini  
92 coefficients  $g_{\text{sub}}$  and  $g_{\text{whole}}$  to measure the inequality among the  $z$  scores. The  $g_{\text{sub}}$  coefficient only  
93 used the distribution of  $z$  scores obtained from cells expressing the gene. The  $g_{\text{whole}}$  coefficient  
94 would use the distribution of all  $z$  scores. The Gini coefficient formula is as in [28]

$$95 \quad g = \frac{1}{2n^2\bar{z}} \sum_{i=1}^n \sum_{j=1}^n |z_i - z_j| \quad (2)$$

96 Here,  $i$  and  $j$  are arbitrary indices in the list of  $z$  scores being used in the computation,  $\bar{z}$  is the  
97 average of these  $z$  scores, and  $n$  is the size of the  $z$  score list. Repeating (1) and (2) for multiple  
98 angles  $\theta$  spanning from 0 to  $2\pi$  would yield the corresponding lists between  $g$  and  $\theta$ , as shown in  
99 the bottom-right table in **Figure 1**. This would lead to two polar curves for Gini coefficients, one  
100 for the cell-points expressing the gene in the cluster, and one for all cell-points in the cluster. We  
101 hypothesize that *the two curves would be closer in the marker-gene scenario than in the non-*  
102 *marker gene scenario*. Therefore, we used the root-mean-square deviation (RSMD) metric, which  
103 is popular in computing fitness in Bioinformatics [31], to determine whether a gene is a marker in  
104 the cluster.

$$105 \quad RSMD = \frac{\sum_{\forall\theta} (g_{\text{sub}}(\theta) - g_{\text{whole}}(\theta))^2}{n_{\theta}} \quad (3)$$

106 Here,  $n_{\theta}$ , also called resolution, is the number of angles  $\theta$  for which we repeat (1) and (2). In this  
107 work, we chose  $n_{\theta} = 1000$ , which makes the angle list  $\theta = 0, \pi/500, 2\pi/500, \dots, 999\pi/500, 2\pi$ .

108  
109 To compute the RSMD statistical p-value for each gene in each cluster, first, we linearly  
110 normalized (scaled) the RSMD computed in (3) such that the normalized RSMD is between 0 and  
111 1. This could be done by dividing (3) by the largest RSMD among all genes in each cluster. Then,  
112 we applied the estimated p-value calculation in [32] to assign a p-value for each gene in each  
113 cluster. Briefly, from the RSMD scores in (3), we verified that the RSMD scores followed a bell-

114 shaped distribution. Then, we computed the mean  $\mu$  and standard deviation  $\sigma$  of the normalized  
115 RSMD. Then, the p-value for each gene in the cluster is

116 
$$p - value(i) = \frac{1}{\sqrt{2\pi\sigma^2}} \int_{-\infty}^U e^{-\frac{(u-\mu)^2}{2\sigma^2}} du \quad (4)$$

117 In (4),  $U$  stands for the normalized RSMD.

118

119

## 120 **Setting up simulation**

121 In this work, to demonstrate how the PGC-RSMD functions, we setup two simulations. In the  
122 first simulation, the cell cluster in the  $x$ - $y$  embedding space had 5000 points, which were uniformly  
123 generated in the unit circle  $x^2 + y^2 \leq 1$ . In the second simulation, the 2D visualization of cell clusters  
124 had the shape identical to the real-world cluster obtained from visualizing the mouse fetal lung  
125 single-cell data [29] using tSNE [33]. We applied the sampling-by-rejection technique [34] to  
126 generate these cluster points as follows. In the first simulation, we randomly generated a point  
127 whose coordinates are between -1 and 1 using uniform sampling, then accepted the point if it had  
128  $x^2 + y^2 \leq 1$ . In the second simulation, the random point coordinates were within the cluster  
129 coordinate range. We extracted the cluster boundary points, compute the polygon from these  
130 boundary points, which allowed deciding whether a point was inside the polygon using Matlab  
131 [35, 36]. In each simulation, we randomly chose  $m$  percentage of points ( $m = 5, 10, 15, \dots, 95$ ) and  
132 assumed that they represent the cells expressing gene. For each  $m$  percentage, we repeat the  
133 simulation 1000 times.

134 In addition, to evaluate how the performance of PGC-RSMD would change in drop-out  
135 scenario, we modified the single-cell data simulator in [37] as follow. First, we use [37] default  
136 parameters to synthesize 2 clusters such that each cluster has 6000 cells, 250 markers (total 500  
137 cluster markers) and other 4500 genes. For each cluster marker, the average expression fol-change  
138 when comparing two clusters was between 4 and 1000. We assigned the drop-out probability for  
139 each gene from 0, 5, 10, ..., to 45% such that there were 25 markers for each drop-out probability.  
140 Then, in each cell, we randomly change the marker expression to 0 according to the markers' drop-  
141 out probability. For each of the 4500 non-cluster markers, the expression in each cell was randomly  
142 between 0 and 500. We assigned the sparisity – defined as the percentage of non-expressing cells  
143 (0 expression) – for each non-cluster marker from 0, 5, 10, .... to 95%. In each cell, we randomly

144 changed the non-cluster marker to 0 according to its sparsity. We used the AUC metric to evaluate  
145 whether the PGC-RSMD score could differentiate the 500 cluster-markers: whether each marker  
146 is specific for the first or the second clusters.

147

148

### 149 **Identifying cardiac muscle cell clusters and marker genes from the neonatal mouse heart** 150 **single-cell data**

151 We obtained the neonatal mouse heart single-cell case-study from the Mouse Cell Atlas [29].  
152 We processed the data as specified in [29]. After preprocessing, the dataset covered 19,494 genes  
153 expression in 5075 cells. We use tSNE [33] (without dimensional reduction) to embed the dataset  
154 into the 2D space. We used the density-based clustering algorithm [38] implemented in Matlab  
155 [39] to identify 9 cell clusters. In the implementation [39], we chose the clustering parameters  
156  $\epsilon = 4$ ,  $\text{minpts} = 40$ . There were 788, 397, 2966, 156, 288, 123, 76, 125, 87 cell-points in  
157 cluster 1, 2, ..., 9, correspondingly. There were 69 cell-points for which the algorithm is unable to  
158 assign to any clusters (Supplemental Data 3).

159

160 We computed the percentage of expressing cells (the naïve approach) and PGC-RSMD for all  
161 genes in all clusters. We removed genes expressing in less than 10% of the cluster cells. For  
162 comparison, in the naïve approach, in each cluster, we selected the top genes sorted by the highest  
163 percentage of expressing cells as the cluster markers. In the PGC-RSMD approach, we selected  
164 the smallest-RSMD genes with its p-value  $< 0.05$  as the cluster marker. In this work, we focused  
165 on identifying the heart muscle cell clusters and their markers. We manually examine the  
166 distribution of cells expressing the well-known heart muscle cell markers: *Myh7*, *Actc1*, and *Tnnt2*  
167 [40-47].

168

169

### 170 **Setting up the re-identifying cluster ID problem**

171 To compare the robustness of our PGC-RSMD markers with other approaches, we setup the  
172 re-identifying cluster ID as follow. From the visual coordinates and 9 clusters of 5075 cells in [29],  
173 we randomly divided the dataset into the training set (4060 cells – 80%) and the test set (1015 cells  
174 – 20%) such that set has samples of all 9 clusters. Using the training set and markers' expression

175 found by PGC-RSMD, in comparison with other approaches, we applied the neural network  
176 algorithm [48] to train models that identify cluster ID. We evaluated these models in the test set  
177 and recorded the classification accuracy and area-under-receiving characteristic curve (AUC).  
178 Here, we hypothesized that the ‘better’ markers would yield higher classification accuracy and  
179 AUC. The other approaches being compared with PGC-RSMD are:

180 - The baseline approach: in this approach, we would train the classification models using all  
181 genes expression.

182 - The differential expression approach: in this approach, we use Fisher’s exact test [49], which  
183 computes the likelihood of a gene being expressed (raw expression  $> 0$ ) in a cluster, compare to  
184 the likelihood of the gene being expressed outside the cluster. In this work, we select the DEG  
185 markers in each cluster according to the following criteria: odd ratio  $> 5$  and the percentage of  
186 expressing cell ( $m$ )  $> 50\%$ .

187 - The SpatialDE [26] approach: SpatialDE finds the gene with high variance regarding the  
188 distribution of ‘point’ on the spatial 2D space. The ‘null’ hypothesis in this approach is the gene  
189 distribution in the ‘spatial space’ follows a multivariate normal distribution. The marker is selected  
190 if the gene expression distribution is significantly different from the null distribution, recorded in  
191 the p-value. In this work, we select the SpatialDE marker according to the following criteria: q-  
192 value (adjusted p-value)  $< 0.05$  and percentage of expressing cell ( $m$ )  $> 50\%$ .

193 In both the DEG and the SpatialDE approach, we sort the markers according to the decreasing  
194 order of  $m$ . To make a fair comparison, we use the same number of markers, ranging from 5 to  
195 100, found by PGC-RSMD, DEG and SpatialDE to train the classification models.

196

197

## 198 **Results**

### 199 **PGC-RSMD strongly correlates to the percentage of expressing cell in a cluster**

200 In **Figure 2**, we show that the fitness between the cluster PGC and the sub-cluster PGC strongly  
201 correlates to the percentage of expressing cell-points as the ‘sub-cluster’  $m$  in the circle-shaped  
202 simulation. In addition, as  $m$  increases, the RSMD variance decreases. We represented the fitness  
203 by the **root-mean-square deviation (RSMD)** as showed in the method section. In this figure, for  
204 each  $m$  (from 5 to 95), we randomly generate 1000 sub-clusters and their PGCs. The detailed result  
205 of this simulation could be found at the Supplemental Data 1.



206 In addition, we observed a similar correlation when experimenting with the mouse fetal lung  
207 single-cell data [29]. **Figure 3a** shows the dataset clusters visualization using tSNE [33] and the  
208 chosen cluster. To synthesize a 3000-point cluster with the same shape to the chosen cluster, we  
209 still applied the random-by-rejection [34] as presented in the Material and Method section. **Figure**  
210 **3b** still shows a strong correlation between  $m$  and RSMD. The detailed result of this simulation  
211 could be found at the Supplemental Data 2.

212  
213 On the other hand, the PGC approach has the potential to answer whether the marker could  
214 identify subpopulations of cells in a cluster. **Figure 4a** demonstrates the 30000-point cluster with  
215 ring-shape  $0.25 \leq x^2 + y^2 \leq 1$ , which appears to be a sub-cluster marker. In this case,  $m = 0.75$ . In  
216 this example, RSMD = 0.033 (**Figure 4b**), which is greater than the RSMD distribution computed  
217 from the random and uniformly-distributed cluster with the same  $m$  (**Figure 4c**).

218  
219 **Figure 5** shows a decrease of PGC-RSMD performance in the drop-out scenario. Briefly, the  
220 synthetic data has 2 clusters, 250 distinct markers for each cluster. Each gene has a specific drop-  
221 out rate as presented in the Material and Method section. Using the PGC-RSMD scores in each  
222 cluster to differentiate these 500 the cluster-specific markers, we observed that PGC-RSMD  
223 achieves very high area-under-receiver-characteristic curve (AUC) ( $>0.95$ ) when the drop-out  
224 probability is small ( $\leq 5\%$ ). However, AUC decreases significantly with the probability of drop-  
225 out (**Figure 5a**). This phenomenon further demonstrates the strong association between RSMD  
226 and the percentage of expressing-cell. When the drop-out rate increases, the percentage of  
227 expressing-cell decreases; therefore, RSMD may mischaracterize a high-dropout marker as non-  
228 marker.

229  
230

### 231 **Case-study: PGC identifies heart muscle cell in neonatal mouse heart single-cell**

232 *PGC-RSMD detects markers to support cell-type identification in single-cell mouse*  
233 *neonatal heart data*

234 **Figure 6** summarizes the neonatal mouse heart single-cell data [29] and its 9-cluster markers.  
235 **Figure 6a** visualizes these 9 clusters with tSNE. The PGC-RSMD founds 258 genes, which are  
236 the union of the smallest 100-PCG-RSMD genes found in each cluster, marking these clusters



237 (Supplemental Data 3). **Figures 6b** and **6c** showed that the gene-cluster marker-association reflects  
238 the underlying gene expression in the single-cell data. In these heatmap figures, each row  
239 corresponds to one gene.

240

241 We identified the muscle-cell clusters 1, 4 and 9 by the expression of *Myh7*, *Actc1*, and *Tnnt2*,  
242 which strongly express in muscle cell type [40-47] (**Figure 7**). Compared to the naïve method  
243 using the percentage of expressing cell, our PGC-RSMD is significantly better by detecting *Actc1*,  
244 which are missed by the naïve approach (**Figure 8**). Furthermore, our approach identified *Mgrn1*  
245 [50, 51], *Ifitm3* [52], *Myl6b* [53] marking cluster 1, which could play important roles in cardiac  
246 muscle functionality, heart failure, and heart development. These genes are not identified using  
247 the naïve approach (**Figure 8**). On the other hand, among genes having a high percentage of  
248 expressing cell, our PGC-RSMD suggests that *Ndufa4l2*, *Mdh2*, and *Atp5g1* may not be heart  
249 muscle cell markers. However, they could suggest a subtype of heart muscle cells (**Figure 9**). The  
250 percentage of expressing cells, PGC-RSMD, statistical p-value and ranks for all genes could be  
251 found in Supplemental Data 3.

252

### 253 *Re-identifying the cells' cluster ID from markers*

254 We observe that the markers found by the PGC-RSMD approach achieve better performance  
255 than the similar SpatialDE [26] markers, and similar performance to the differentially-expressed-  
256 gene (DEG) when being used to re-identify cell's cluster ID. Briefly, after computing the visual  
257 coordinate and cluster ID of all cells, we randomly split the dataset [29] into the training (80%)  
258 and test (20%) sets. We only applied the baseline PGC-RSMD, SpatialDE and DEG approaches  
259 to find the markers and built machine learning models to predict the cells' cluster ID from these  
260 markers in the training set. In this experiment, we used all genes to train the predictor in the  
261 baseline approach. The detailed description of this experiment could be found in the method  
262 section. Evaluating the prediction models in the test set, the PGC-RSMD approach performs  
263 closely to the DEG; both have cluster ID prediction accuracy above 0.9 and AUC above 0.95 on  
264 average (**Figure 10**). These two approaches significantly outperform SpatialDE, whose accuracy  
265 is just above the baseline.

266

267

## 268 Discussion

269 In this work, we show that integrating the embedded information, which does not often have a  
270 deterministic relationship with gene expression and is primarily for clustering a visualization,  
271 could lead to new insights to biomarkers in single-cell data. In the mouse neonatal heart case-  
272 study, our PGC-RSMD approach could recall *Actc1* as the marker characterizing heart muscle cell.  
273 Meanwhile, the approach using the ratio of expressing cell may fail to recall because a large  
274 percentage of cells does not capture *Actc1* transcript. Therefore, our proposed technique has the  
275 potential to handle analytical issues due to single-cell data quality, such as short-read and low  
276 sequencing depth [54-56]. On the other hand, for genes having high percentage of expressing cell,  
277 the PGC approach could further show that these genes may characterize novel cardiac muscle cell  
278 sub-types for future studies, such as in *Mdh2* and *Myl6b*. Therefore, we suggest that the biomarker  
279 discovery problem could be divided into two sub-problems: the ‘global markers’ specify cell types  
280 and the ‘local markers’ specify subtypes. We could solve these two sub-problems by the right  
281 integration of gene expression and visual information.

282  
283 In this work, we primarily demonstrate how PGC detects markers for single cluster, which  
284 does not need the gene expression from other clusters in the dataset. The approach could be  
285 extended to incorporate the ‘global’ expression as follow. First, a PGC analysis can be performed  
286 with marker cells as the foreground and all cells (regardless of their cluster assignments) as the  
287 background. Second, a PGC analysis can be performed for each cluster in the dataset  
288 independently and compare among the clusters’ marker lists. In the neonatal mouse heart case-  
289 study, this approach shows two types of marker: one expressing globally in all clusters, which are  
290 likely heart-tissue specific; the other express locally in one or some specific cluster, which are  
291 likely cell-type specific.

292  
293 In addition to our proposed PGC approach, we could apply several alternative strategies to  
294 integrate the gene expression and visual information to solve the single-cell biomarker discovery  
295 problem. For example, the fractal dimension analysis strategies [57, 58], which focus on evaluating  
296 the uniformity of cell-point distribution, could be applied to identify markers in which the  
297 expressing cells distribute more densely than they are in the overall cluster. In addition, we could  
298 also customize the statistical texture analysis in image processing, such as homogeneity and

299 integrity [59, 60], to analyze the difference between the overall cluster cell-point and cell-  
300 expressing gene point as the metric to determine markers. On the other hand, choosing the  
301 appropriate visual approach depends on the nature of the data and the problem. Our experiment  
302 with the re-identifying cluster ID shows that the well-established SpatialDE [26] does not  
303 outperform our approach and the DEG approach. One explanation is that in our problem, a good  
304 marker for identifying cell type usually follows a good ‘default’ distribution over the visual space;  
305 meanwhile, the SpatialDE aims to find markers that express significantly different from a default  
306 distribution.

307

308 The major limitation of our proposed PGC-RSMD approach is the long computational time,  
309 especially when comparing to the DEG approaches. This is similar to SpatialDE, which also used  
310 visual information to detect marker genes. The DEG approaches may only need to compute one  
311 statistical test to determine whether a gene is a marker for all clusters. Meanwhile, to draw the  
312 curves, PGC-RSMD would need to compute hundreds to thousands, which depends on the desired  
313 curve resolution, to characterize one gene in one cluster. Due to the long computational time, we  
314 were not able to create multiple simulations, which is the ideal approach, run to compute the  
315 statistical [32] p-value for the RSMD score. Therefore, we decided to reapply the estimation  
316 presented to compute the p-value. This approach is computationally more efficient but may not  
317 well-reflect the statistical characteristic of the single-cell data. In addition, we have not fully  
318 tackled the problem of choosing the right threshold to determine whether a gene expresses in a  
319 cell. Because of the strong association between PGC-RSMD and the percentage of expressing-  
320 cell, we expect that the result would significantly different when choosing a different threshold to  
321 determine whether a gene expresses in a cell. In this work, choosing 0 as the threshold still yields  
322 good performance because of the high sparsity in the real dataset.

323

## 324 **Conclusions**

325 In this work, we have presented Polar Gini Curve, a novel technique to detect markers from  
326 the single-cell RNA expression data using visual information. In principle, our technique could  
327 complement the state-of-the-art approach: the PGC technique finds markers such that the  
328 expressing cells are evenly distributed throughout the cluster space; meanwhile, the state-of-the-  
329 art approach finds markers assuming a multivariate normal distribution of gene expression in the

330 visual space. We have demonstrated that the PGC technique performs better in some tasks in  
331 single-cell analysis.

332

333

### 334 **Authors' contribution**

335 TN designed and implemented the core polar Gini algorithm, designed the sampling strategies  
336 in the simulation, performed the neonatal heart single-cell case-study, and primarily prepared the  
337 manuscript. JJ prepared the software package, preprocessed the single-cell data, and executed the  
338 simulation designs. NX designed different simulation scenarios, interpreted the statistical  
339 outcomes, and prepared the literature review. JC originated the idea of using Gini coefficient  
340 curves to integrate gene expression, cell-point distribution, and cluster shape to solve the  
341 biomarker discovery problem, designed the performance evaluation, and supervised the overall  
342 technical development. All authors reviewed/ revised and approved the manuscript.

343

344

### 345 **Competing interests**

346 The authors have declared that no competing interests exist.

347

348

### 349 **Acknowledgments**

350 This work was supported by the 'startup budget' granted to Jake Chen from the University of  
351 Alabama at Birmingham.

352

353

### 354 **References**

- 355 1. Zhu, Z., et al., Single-cell transcriptome in the identification of disease biomarkers:  
356 opportunities and challenges. *J Transl Med*, 2014. 12: p. 212.
- 357 2. Finak, G., et al., MAST: a flexible statistical framework for assessing transcriptional  
358 changes and characterizing heterogeneity in single-cell RNA sequencing data. *Genome*  
359 *Biol*, 2015. 16: p. 278.

- 360 3. McCarthy, D.J., et al., Scater: pre-processing, quality control, normalization and  
361 visualization of single-cell RNA-seq data in R. *Bioinformatics*, 2017. 33(8): p. 1179-1186.
- 362 4. Poirion, O.B., et al., Single-Cell Transcriptomics *Bioinformatics and Computational*  
363 *Challenges*. *Front Genet*, 2016. 7: p. 163.
- 364 5. Jaakkola, M.K., et al., Comparison of methods to detect differentially expressed genes  
365 between single-cell populations. *Brief Bioinform*, 2017. 18(5): p. 735-743.
- 366 6. Wang, T., et al., Comparative analysis of differential gene expression analysis tools for  
367 single-cell RNA sequencing data. *BMC Bioinformatics*, 2019. 20(1): p. 40.
- 368 7. Love, M.I., W. Huber, and S. Anders, Moderated estimation of fold change and dispersion  
369 for RNA-seq data with DESeq2. *Genome Biol*, 2014. 15(12): p. 550.
- 370 8. Robinson, M.D., D.J. McCarthy, and G.K. Smyth, edgeR: a Bioconductor package for  
371 differential expression analysis of digital gene expression data. *Bioinformatics*, 2010.  
372 26(1): p. 139-40.
- 373 9. Pezzotti, N., et al., Approximated and User Steerable tSNE for Progressive Visual  
374 Analytics. *IEEE Trans Vis Comput Graph*, 2017. 23(7): p. 1739-1752.
- 375 10. Becht, E., et al., Dimensionality reduction for visualizing single-cell data using UMAP.  
376 *Nat Biotechnol*, 2018.
- 377 11. Qiu, X., et al., Reversed graph embedding resolves complex single-cell trajectories. *Nat*  
378 *Methods*, 2017. 14(10): p. 979-982.
- 379 12. Yang, Y., et al., SAFE-clustering: Single-cell Aggregated (from Ensemble) clustering for  
380 single-cell RNA-seq data. *Bioinformatics*, 2019. 35(8): p. 1269-1277.
- 381 13. Kiselev, V.Y., et al., SC3: consensus clustering of single-cell RNA-seq data. *Nat Methods*,  
382 2017. 14(5): p. 483-486.
- 383 14. Aibar, S., et al., SCENIC: single-cell regulatory network inference and clustering. *Nat*  
384 *Methods*, 2017. 14(11): p. 1083-1086.
- 385 15. Zheng, G.X., et al., Massively parallel digital transcriptional profiling of single cells. *Nat*  
386 *Commun*, 2017. 8: p. 14049.
- 387 16. Satija, R., et al., Spatial reconstruction of single-cell gene expression data. *Nat Biotechnol*,  
388 2015. 33(5): p. 495-502.
- 389 17. Kiselev, V.Y., T.S. Andrews, and M. Hemberg, Challenges in unsupervised clustering of  
390 single-cell RNA-seq data. *Nat Rev Genet*, 2019. 20(5): p. 273-282.

- 391 18. Yuan, G.C., et al., Challenges and emerging directions in single-cell analysis. *Genome*  
392 *Biol*, 2017. 18(1): p. 84.
- 393 19. Conover, W.J. and W.J. Conover, *Practical nonparametric statistics*. 1980.
- 394 20. Hollander, M., D.A. Wolfe, and E. Chicken, *Nonparametric statistical methods*. Vol. 751.  
395 2013: John Wiley & Sons.
- 396 21. Guo, M., et al., SINCERA: A Pipeline for Single-Cell RNA-Seq Profiling Analysis. *PLoS*  
397 *Comput Biol*, 2015. 11(11): p. e1004575.
- 398 22. Birnbaum, Z. On a use of the Mann-Whitney statistic. in *Proceedings of the Third Berkeley*  
399 *Symposium on Mathematical Statistics and Probability, Volume 1: Contributions to the*  
400 *Theory of Statistics*. 1956. The Regents of the University of California.
- 401 23. Korthauer, K.D., et al., A statistical approach for identifying differential distributions in  
402 single-cell RNA-seq experiments. *Genome Biol*, 2016. 17(1): p. 222.
- 403 24. Trapnell, C., et al., The dynamics and regulators of cell fate decisions are revealed by  
404 pseudotemporal ordering of single cells. *Nat Biotechnol*, 2014. 32(4): p. 381-386.
- 405 25. Kharchenko, P.V., L. Silberstein, and D.T. Scadden, Bayesian approach to single-cell  
406 differential expression analysis. *Nat Methods*, 2014. 11(7): p. 740-2.
- 407 26. Svensson, V., S.A. Teichmann, and O. Stegle, SpatialDE: identification of spatially  
408 variable genes. *Nat Methods*, 2018. 15(5): p. 343-346.
- 409 27. Edsgard, D., P. Johnsson, and R. Sandberg, Identification of spatial expression trends in  
410 single-cell gene expression data. *Nat Methods*, 2018. 15(5): p. 339-342.
- 411 28. Gini, C., Concentration and dependency ratios. *Rivista di politica economica*, 1997. 87: p.  
412 769-792.
- 413 29. Han, X., et al., Mapping the Mouse Cell Atlas by Microwell-Seq. *Cell*, 2018. 173(5): p.  
414 1307.
- 415 30. Strang, G., et al., *Introduction to linear algebra*. Vol. 3. 1993: Wellesley-Cambridge Press  
416 Wellesley, MA.
- 417 31. Hyndman, R.J. and A.B. Koehler, Another look at measures of forecast accuracy.  
418 *International journal of forecasting*, 2006. 22(4): p. 679-688.
- 419 32. Yue, Z., et al., WIPER: Weighted in-Path Edge Ranking for biomolecular association  
420 networks. *Quantitative Biology*, 2019. 7(4): p. 313-326.

- 421 33. Maaten, L.v.d. and G. Hinton, Visualizing data using t-SNE. Journal of machine learning  
422 research, 2008. 9(Nov): p. 2579-2605.
- 423 34. Bishop, C.M., Pattern recognition and machine learning. 2006: springer.
- 424 35. MathWorks. Matlab - inpolygon. 2019 2019/06/05]; Available from:  
425 <https://www.mathworks.com/help/matlab/ref/inpolygon.html>.
- 426 36. MathWorks. Matlab - boundary. 2019 2019/06/05]; Available from:  
427 <https://www.mathworks.com/help/matlab/ref/boundary.html>.
- 428 37. Baruzzo, G., I. Patuzzi, and B. Di Camillo, SPARSim Single Cell: a count data simulator  
429 for scRNA-seq data. Bioinformatics, 2019.
- 430 38. Ester, M., et al. A density-based algorithm for discovering clusters in large spatial  
431 databases with noise. in Kdd. 1996.
- 432 39. MathWorks. Matlab - dbscan. 2019; Available from:  
433 <https://www.mathworks.com/help/stats/dbscan.html>.
- 434 40. Bashyam, M.D., et al., Molecular genetics of familial hypertrophic cardiomyopathy (FHC).  
435 J Hum Genet, 2003. 48(2): p. 55-64.
- 436 41. Finsterer, J., C. Stollberger, and J.A. Towbin, Left ventricular noncompaction  
437 cardiomyopathy: cardiac, neuromuscular, and genetic factors. Nat Rev Cardiol, 2017.  
438 14(4): p. 224-237.
- 439 42. Keren, A., P. Syrris, and W.J. McKenna, Hypertrophic cardiomyopathy: the genetic  
440 determinants of clinical disease expression. Nat Clin Pract Cardiovasc Med, 2008. 5(3): p.  
441 158-68.
- 442 43. Morita, H., et al., Shared genetic causes of cardiac hypertrophy in children and adults. N  
443 Engl J Med, 2008. 358(18): p. 1899-908.
- 444 44. Jiang, H.K., et al., Reduced ACTC1 expression might play a role in the onset of congenital  
445 heart disease by inducing cardiomyocyte apoptosis. Circ J, 2010. 74(11): p. 2410-8.
- 446 45. Kwon, C., et al., A regulatory pathway involving Notch1/beta-catenin/Isl1 determines  
447 cardiac progenitor cell fate. Nat Cell Biol, 2009. 11(8): p. 951-7.
- 448 46. Wei, B. and J.P. Jin, TNNT1, TNNT2, and TNNT3: Isoform genes, regulation, and  
449 structure-function relationships. Gene, 2016. 582(1): p. 1-13.



- 450 47. Ju, Y., et al., Troponin T3 expression in skeletal and smooth muscle is required for growth  
451 and postnatal survival: characterization of Tnnt3(tm2a(KOMP)Wtsi) mice. *Genesis*, 2013.  
452 51(9): p. 667-75.
- 453 48. Russell, S. and P. Norvig, *Artificial Intelligence: A Modern Approach*. 2003. Prentice Hall,  
454 Upper Saddle River, New Jersey.
- 455 49. Mehta, C.R. and N.R. Patel, A network algorithm for performing Fisher's exact test in  $r \times c$   
456 contingency tables. *Journal of the American Statistical Association*, 1983. 78(382): p. 427-  
457 434.
- 458 50. Mukherjee, R. and O. Chakrabarti, Regulation of Mitofusin1 by Mahogunin Ring Finger-  
459 1 and the proteasome modulates mitochondrial fusion. *Biochim Biophys Acta*, 2016.  
460 1863(12): p. 3065-3083.
- 461 51. Liu, X., et al., Differential microRNA Expression and Regulation in the Rat Model of Post-  
462 Infarction Heart Failure. *PLoS One*, 2016. 11(8): p. e0160920.
- 463 52. Lau, S.L., et al., Interferons induce the expression of IFITM1 and IFITM3 and suppress  
464 the proliferation of rat neonatal cardiomyocytes. *J Cell Biochem*, 2012. 113(3): p. 841-7.
- 465 53. Wang, L., et al., Mutations in myosin light chain kinase cause familial aortic dissections.  
466 *Am J Hum Genet*, 2010. 87(5): p. 701-7.
- 467 54. Shalek, A.K., et al., Single-cell RNA-seq reveals dynamic paracrine control of cellular  
468 variation. *Nature*, 2014. 510(7505): p. 363-9.
- 469 55. Rizzetto, S., et al., Impact of sequencing depth and read length on single cell RNA  
470 sequencing data of T cells. *Sci Rep*, 2017. 7(1): p. 12781.
- 471 56. McDavid, A., et al., Data exploration, quality control and testing in single-cell qPCR-based  
472 gene expression experiments. *Bioinformatics*, 2013. 29(4): p. 461-7.
- 473 57. Fortin, C., et al., Fractal dimension in the analysis of medical images. *IEEE Engineering  
474 in Medicine and Biology Magazine*, 1992. 11(2): p. 65-71.
- 475 58. Davies, S. and P. Hall, Fractal analysis of surface roughness by using spatial data. *Journal  
476 of the Royal Statistical Society: Series B (Statistical Methodology)*, 1999. 61(1): p. 3-37.
- 477 59. Bharati, M.H., J.J. Liu, and J.F. MacGregor, Image texture analysis: methods and  
478 comparisons. *Chemometrics and intelligent laboratory systems*, 2004. 72(1): p. 57-71.

479 60. Kunimatsu, A., et al., Comparison between glioblastoma and primary central nervous  
480 system lymphoma using MR image-based texture analysis. *Magnetic Resonance in*  
481 *Medical Sciences*, 2017: p. mp. 2017-0044.

482

483

## 484 **Figure legends**

485 Figure 1. Overall workflow to compute the PGC-RSMD metric for one gene in one cluster of cells.  
486 Here, the data points, histogram, and PGC for cells expressing the gene are cyan. The ones for the  
487 whole cells in the cluster are red.

488

489 Figure 2. Boxplot showing a strong correlation between ‘subcluster’ percentage ( $m$ ) and cluster-  
490 subcluster PGC fitness (RSMD) in uniformly-distributed and a circular cluster.

491

492 Figure 3. a) The selected cluster for the experiment in [29]. b) Correlation between ‘subcluster’  
493 percentage ( $m$ ) and cluster-subcluster PGC fitness (RSMD) in the selected cluster.

494

495 Figure 4. The ring-shape simulation study: a) Visualization of the cluster and ring-shape sub-  
496 cluster ( $m = 0.75$ ); b) PGC yield RSMD = 0.033; c) Distribution of RSMD, extracted from Figure  
497 2 with  $m = 75\%$ , when the sub-cluster uniformly distributed on the cluster area.

498

499 Figure 5. PGC-RSMD performance in recalling cluster marker in drop-out simulation. a) heatmap  
500 showing the simulation design of 500 markers and 4500 neutral genes, with drop out / percentage  
501 of cell expressing between 5 and 100%; b) The simulation data 2D visualization; c) the AUC drops  
502 when drop-out increases.

503

504 Figure 6. The result from mouse neonatal heart single-cell [29] analysis. a) the tSNE plot shows 9  
505 clusters. b) gene-cluster marker relationship (from 258 genes) found by PGC-RSMD; ■ gene is  
506 found as marker, ■ gene is found as non-marker. c) expression heatmap for these genes.

507

508 Figure 7: Heart muscle cell clusters, identified by *Myh7*, *Actc1*, and *Tnnt2*

509

510 Figure 8. PGC-RSMD highlight makers that do not have high percentage of expressing cells: PGCs  
511 of *Actc1*, *Mgrn1*, *Ifitm3*, *Myl6b* in cluster 1. The numbers in the parenthesis are ranks of these  
512 genes in each metric

513

514 Figure 9. PGC-RSMD shows that gene has high percentage of expressing cells: *Ndufa4l2*, *Mdh2*,  
515 and *Atp5g1*, may not be markers in cluster 1. These genes appear to highlight a local subcluster.  
516 The numbers in the parenthesis are ranks of these genes in each metric.

517

518 Figure 10. Performance of the PGC-RSMD, SpatialDE, and DEG in re-identifying the cell's  
519 cluster ID problem using dataset [26]. The x-axis shows the number of top-significant markers  
520 being selected to train the prediction models. a) accuracy; b) AUC over 9 clusters.

521

2D visualization

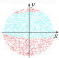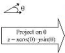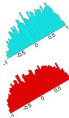

$$Gini(g)$$

$$\frac{1}{2n^2} \sum_{i=1}^n \sum_{j=1}^n |x_i - x_j|$$

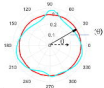

| Angle $\theta$ | $S_{sub}$ | $S_{whole}$ | $f_{\theta} =  S_{sub} - S_{whole} $ |
|----------------|-----------|-------------|--------------------------------------|
| ...            | ...       | ...         | ...                                  |
| 30°            | 0.26      | 0.29        | 0.03                                 |
| ...            | ...       | ...         | ...                                  |

$$RSMD = \sum f_{\theta} / n_{\theta}$$

 Cell expressing genes (sub cluster)

 All cells (whole cluster)

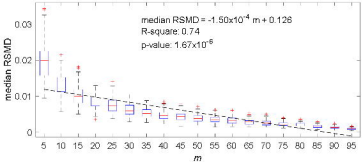

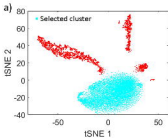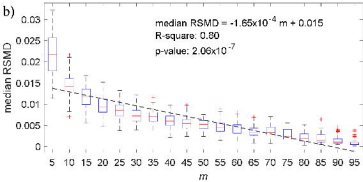

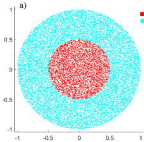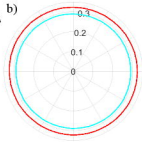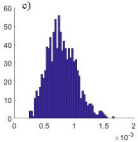



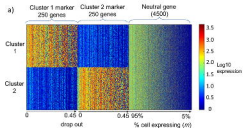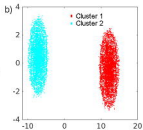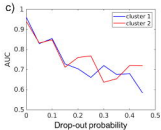

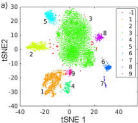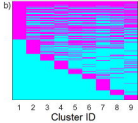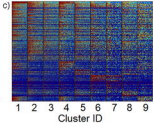

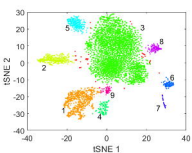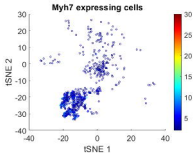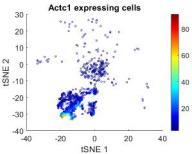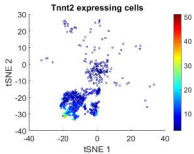

**Actc1, expression in cluster 1**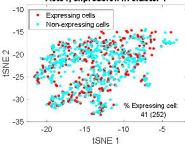**Actc1, PGCs in cluster 1**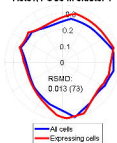**Mgrn1, expression in cluster 1**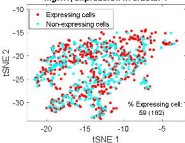**Mgrn1, PGCs in cluster 1**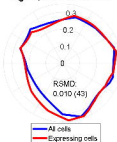**Ifitm3, expression in cluster 1**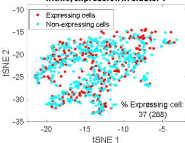**Ifitm3, PGCs in cluster 1**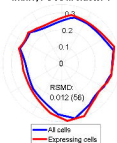**Myf6b, expression in cluster 1**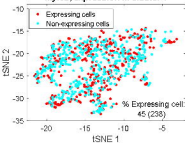**Myf6b, PGCs in cluster 1**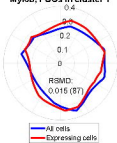

**Ndufa4l2, expression in cluster 1**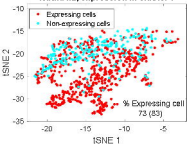**Ndufa4l2, PGCs in cluster 1**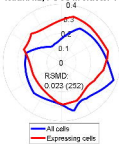**Mdh2, expression in cluster 1**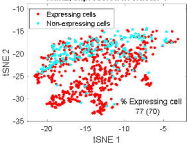**Mdh2, PGCs in cluster 1**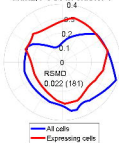**Atp5g1, expression in cluster 1**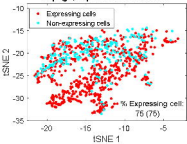**Atp5g1, PGCs in cluster 1**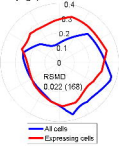

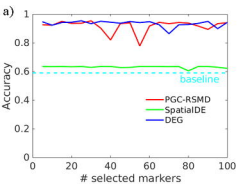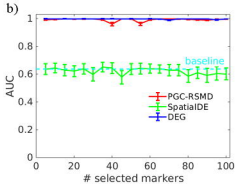

Source: https://www.biorxiv.org/content/10.1101/2020.03.04.977140v2.full.pdf
